# Supplementary material
Source: PubMed Central journal article supplement (PMC9338227)
Supplement: 41598_2022_16996_MOESM1_ESM.pdf [file 41598_2022_16996_MOESM1_ESM.pdf]

**Most plant-based meat alternative buyers also buy meat: An analysis of household demographics, habit formation, and buying behavior among meat alternative buyers.**

**Zachary T. Neuhofer<sup>1\*</sup>, and Jayson L. Lusk<sup>1</sup>**

May 11, 2022

**Keywords:** plant-based, meat alternatives, demographics, purchasing patterns, repeat purchases

<sup>1</sup>Department of Agricultural Economics, Purdue University, West Lafayette, IN, USA

\*Corresponding Author. Email: [zneuhofe@purdue.edu](mailto:zneuhofe@purdue.edu)

Supplementary Figure 1: Average Market Expenditure on Plant-Based Meat Alternatives by week

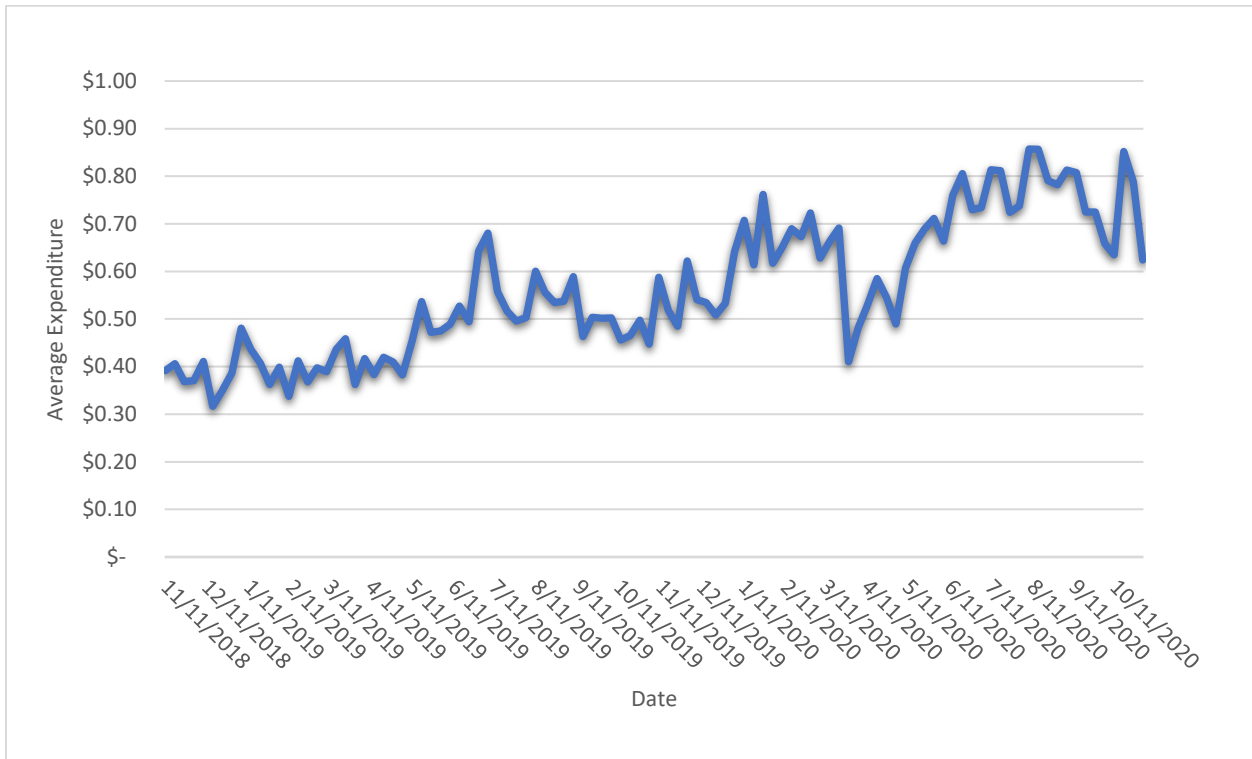

Supplementary Figure 2: Average Market Plant Based Meat Alternative Units Purchased by Week

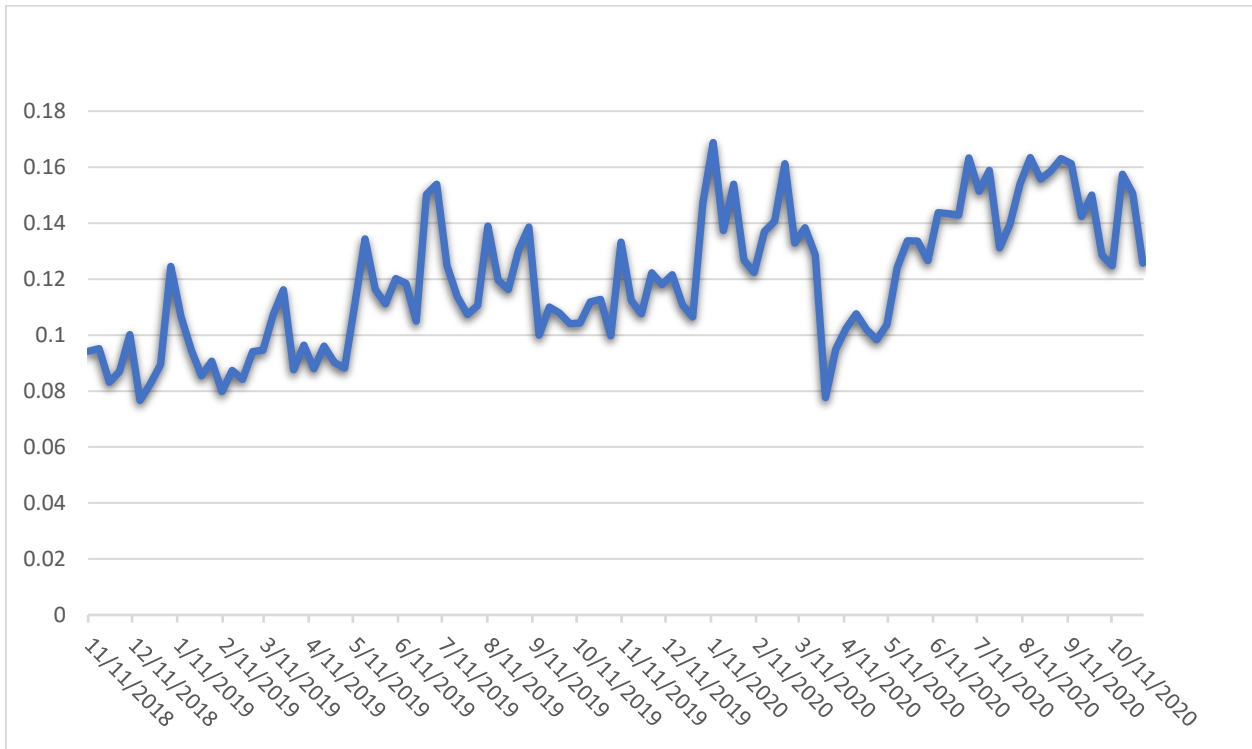

Supplementary Figure 3: Average Market Expenditures on Ground Meat

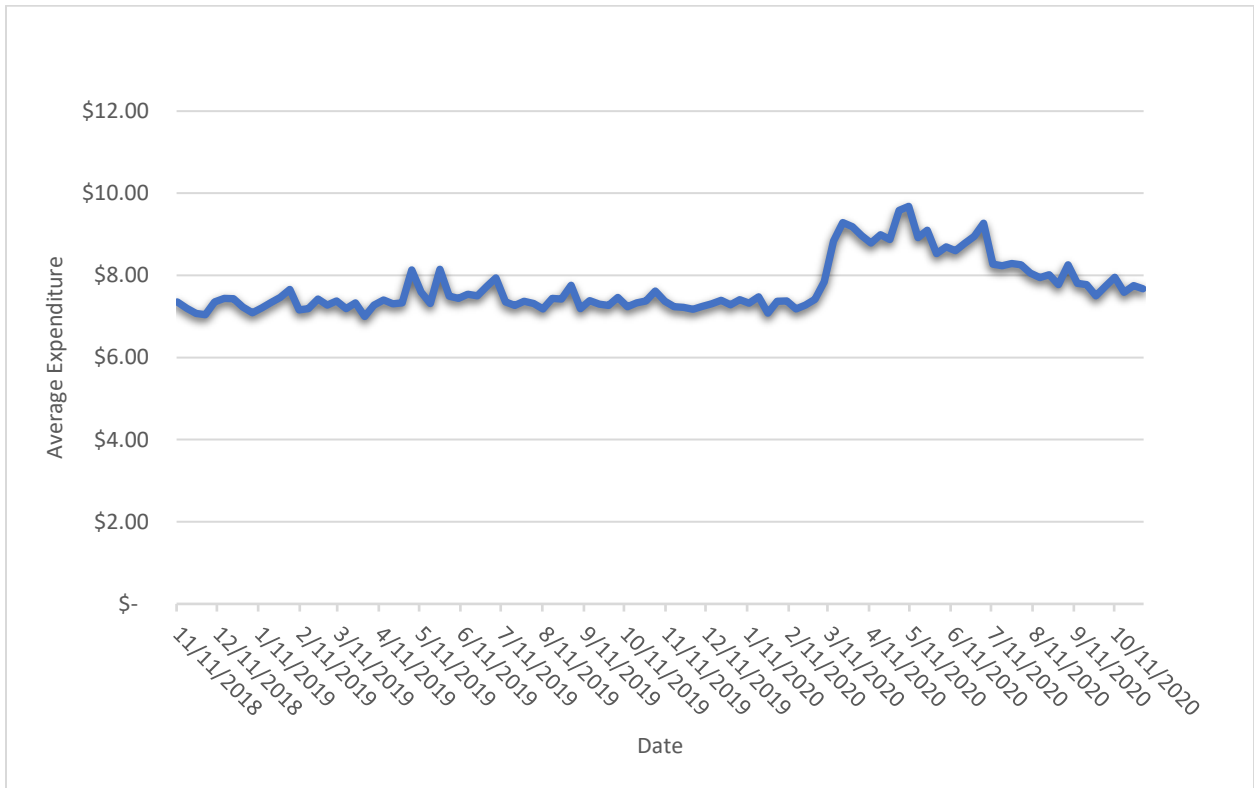

Supplementary Figure 4: Average Market Ground Meat Units Purchased by Week

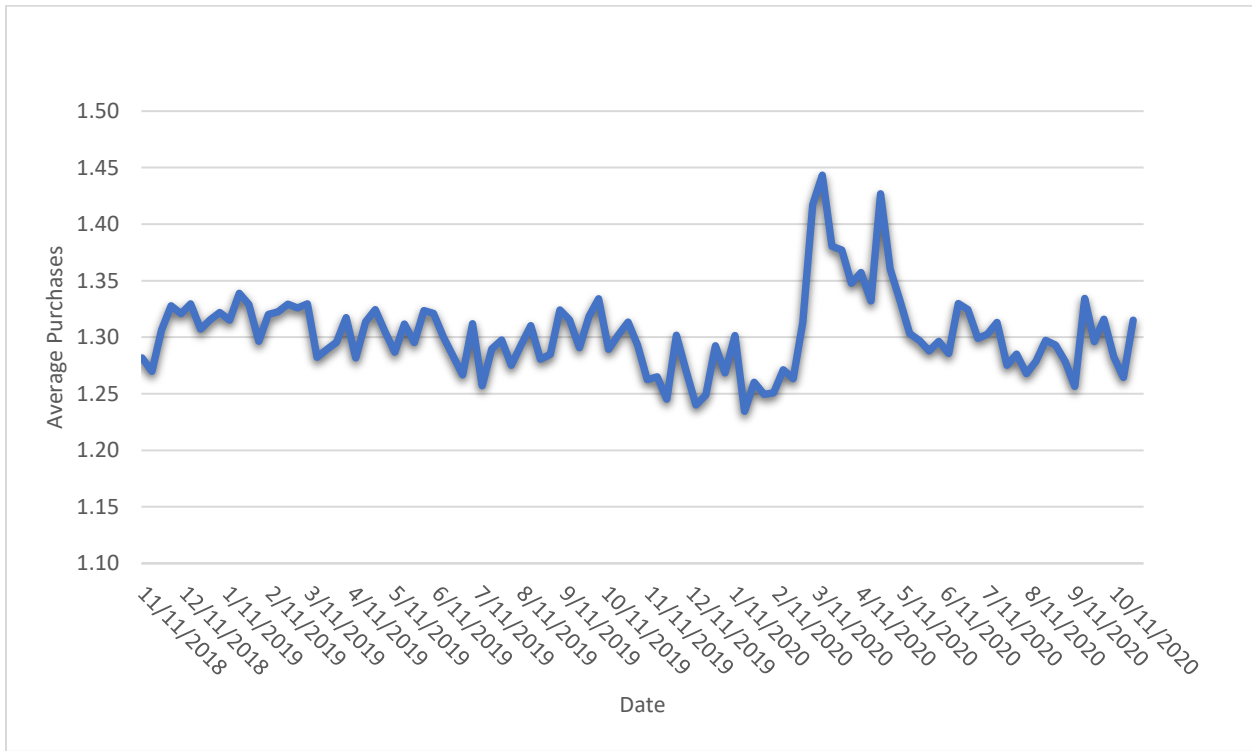

Supplementary Figure 5: Number of Households First Purchasing a Plant-Based Meat Alternative

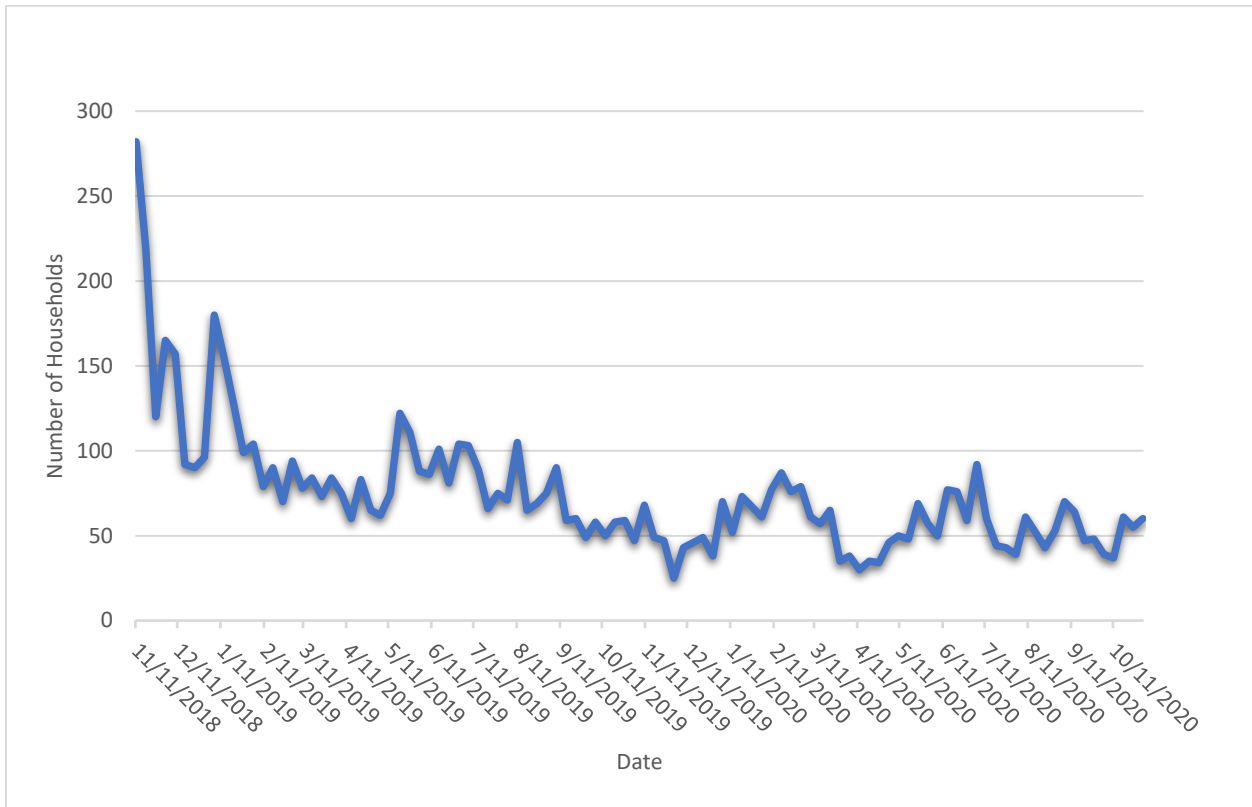

Supplementary Table 1: Sample Demographics

| <b>Variable</b>      | <b>Category</b>   | <b>Full Sample</b> | <b>Meat Alternative Buyers</b> | <b>Meat Only Buyers</b> |
|----------------------|-------------------|--------------------|--------------------------------|-------------------------|
| Age                  | <35               | 5.73%              | 7.23%                          | 5.35%                   |
|                      | 35-64             | 61.43%             | 65.85%                         | 60.33%                  |
|                      | 65+               | 32.84%             | 26.92%                         | 34.31%                  |
| Household Size       | 1                 | 22.78%             | 24.17%                         | 22.44%                  |
|                      | 2                 | 45.49%             | 42.56%                         | 46.22%                  |
|                      | 3                 | 13.73%             | 14.60%                         | 13.52%                  |
|                      | 4                 | 10.83%             | 11.79%                         | 10.59%                  |
|                      | 5+                | 7.16%              | 6.88%                          | 7.23%                   |
| Marital Status       | Married           | 66.76%             | 64.82%                         | 67.24%                  |
|                      | Single Female     | 26.57%             | 28.63%                         | 26.06%                  |
|                      | Single Male       | 6.66%              | 6.88%                          | 6.69%                   |
| College Education    | No                | 58.31%             | 49.45%                         | 60.51%                  |
|                      | Yes               | 41.69%             | 50.55%                         | 39.49%                  |
| Employed             | No                | 28.48%             | 23.50%                         | 29.72%                  |
|                      | Yes               | 71.52%             | 76.50%                         | 70.28%                  |
| Income               | <\$45,000         | 31.43%             | 26.50%                         | 32.66%                  |
|                      | \$45,000-\$99,999 | 45.67%             | 45.34%                         | 45.75%                  |
|                      | \$100,000+        | 22.90%             | 28.15%                         | 21.59%                  |
| Race                 | White             | 79.26%             | 75.45%                         | 80.21%                  |
|                      | African American  | 11.43%             | 13.46%                         | 10.92%                  |
|                      | Other Minority    | 9.31%              | 11.08%                         | 8.87%                   |
| Hispanic             | No                | 91.58%             | 91.06%                         | 91.71%                  |
|                      | Yes               | 8.42%              | 8.94%                          | 8.29%                   |
| Presence of children | No                | 80.02%             | 78.86%                         | 80.31%                  |
|                      | Yes               | 19.98%             | 21.14%                         | 19.69%                  |
| <b>Total</b>         |                   | <b>38,966</b>      | <b>7761</b>                    | <b>31,205</b>           |

Supplementary Table 2: Market Overview Metrics

| <b>Metric</b>                                                                 | <b>Sample</b>           | <b>Sample Size</b> | <b>Share or Average</b> |
|-------------------------------------------------------------------------------|-------------------------|--------------------|-------------------------|
| <i>Behavioral overview</i>                                                    |                         |                    |                         |
| Share of meat alternative buyers                                              | Full Sample             | 38,966             | 19.92%                  |
| Share of households who did not purchase meat alternatives                    | Full sample             | 38,966             | 80.08%                  |
| Share of meat alternative buyers who purchased them on more than one occasion | Full Sample             | 38,966             | 12.03%                  |
|                                                                               | Meat Alternative Buyers | 7,761              | 60.15%                  |
| Share of households that did not purchase meat                                | Full Sample             | 38,966             | 2.79%                   |
|                                                                               | Meat Alternative Buyers | 7,761              | 14.51%                  |
| Share of meat alternative buyers who purchased meat and meat alternatives     | Full Sample             | 38,966             | 17.12%                  |
|                                                                               | Meat Alternative buyers | 7,761              | 85.97%                  |



Supplementary Table 3: Ground Meat and Meat Alternative Purchases and Expenditure Before and After the Beginning of the COVID-19 Pandemic

| Metric                                                                                              | Sample                  | Sample Size | Average              |
|-----------------------------------------------------------------------------------------------------|-------------------------|-------------|----------------------|
| Average units of meat purchased weekly prior to the beginning of the COVID-19 pandemic              | Full Sample             | 38,966      | 0.14 <sup>++</sup>   |
| Average units of meat purchased weekly after the beginning of the COVID-19 pandemic                 | Full Sample             | 38,966      | 0.16 <sup>++</sup>   |
| Average units of PBMA's purchased weekly prior to the beginning of the COVID-19 pandemic            | Full Sample             | 38,966      | 0.01 <sup>++</sup>   |
| Average units of PBMA's purchased weekly after the beginning of the COVID-19 pandemic               | Full Sample             | 38,966      | 0.02 <sup>++</sup>   |
| Average units of ground meat purchased weekly prior to the beginning of the COVID-19 pandemic       | Meat Alternative Buyer  | 7,761       | 0.14 <sup>++</sup>   |
| Average units of ground meat purchased after the beginning of the COVID-19 pandemic                 | Meat Alternative Buyer  | 7,761       | 0.15 <sup>++</sup>   |
| Average units of meat alternatives purchased weekly prior to the beginning of the COVID-19 pandemic | Meat Alternative Buyer  | 7,761       | 0.06 <sup>++</sup>   |
| Average units of meat alternatives purchased after the beginning of the COVID-19 pandemic           | Meat Alternative Buyer  | 7,761       | 0.08 <sup>++</sup>   |
| Average weekly expenditure on ground meats prior to the beginning of the COVID-19 pandemic          | Full Sample             | 38,966      | \$0.99 <sup>++</sup> |
| Average weekly expenditure on ground meats after the beginning of the COVID-19 pandemic             | Full Sample             | 38,966      | \$1.25 <sup>++</sup> |
| Average weekly expenditure on meat alternatives prior to the beginning of the COVID-19 pandemic     | Full Sample             | 38,966      | \$0.05 <sup>++</sup> |
| Average weekly expenditure on meat alternatives after the beginning of the COVID-19 pandemic        | Full Sample             | 38,966      | \$0.08 <sup>++</sup> |
| Average weekly expenditure on ground meats prior to the beginning of the COVID-19 pandemic          | Meat Alternative Buyers | 7,761       | \$0.87 <sup>++</sup> |
| Average weekly expenditure on ground meats after the beginning of the COVID-19 pandemic             | Meat Alternative Buyers | 7,761       | \$1.08 <sup>++</sup> |
| Average weekly expenditure on meat alternatives prior to the beginning of the COVID-19 pandemic     | Meat Alternative Buyers | 7,761       | \$0.28 <sup>++</sup> |
| Average weekly expenditure on meat alternatives after the beginning of the COVID-19 pandemic        | Meat Alternative Buyers | 7,761       | \$0.42 <sup>++</sup> |

A + denotes a paired T-test to compare the difference in means of two different variables with the null hypothesis  $\mu_{after} - \mu_{before}$ . A + denotes significance at the 5% level and a ++ denotes significance at the 1% level.
